# Supplementary material for: Prenatal diagnosis of hypospadias with 2-dimensional and 3-dimensional ultrasonography
Source: PubMed Central journal article supplement (PMC6572849; doi:10.1038/s41598-019-45221-z), 2019-06-17

**Prenatal diagnosis of hypospadias with 2-dimensional and 3-dimensional ultrasonography**

Xiaohua Li, Aqing Liu, Zhonglu Zhang, Xia An, Shaochun Wang

**Table 1. Summary of prenatal diagnosis with 2-dimensional ultrasonography alone and in combination with 3-dimensional ultrasonography**

| Modality |           | 2DUS+3DUS |           |
|----------|-----------|-----------|-----------|
|          |           | Correct   | Incorrect |
| 2DUS     | Correct   | 35        | 1         |
|          | Incorrect | 5         | 6         |

**Table 2. Descriptions of 21 cases of hypospadias diagnosed correctly both by 2DUS alone and 2DUS in combination with 3DUS**

| Case | GA, wk | Prenatal 2DUS and 3DUS Findings                                                                                                                                                           | Associated Postnatal Anomalies                   | Karyotype      |
|------|--------|-------------------------------------------------------------------------------------------------------------------------------------------------------------------------------------------|--------------------------------------------------|----------------|
| 1    | 27     | A blunt tip at the penile shaft, the ventral incurvation of the penis, thickened dorsal prepuce, the appearance of urethral groove, the anomalous urinary stream during fetal micturition | Middle hypospadias, bilateral undescended testis | 46XY           |
| 2    | 30     | A blunt tip at the penile shaft, a short penile shaft, the ventral incurvation of the penis, thickened dorsal prepuce, penoscrotal transposition                                          | Posterior hypospadias, cleft lip                 | 46XY (Small Y) |
| 3    | 33     | A blunt tip at the penile shaft, a short penile shaft, thickened dorsal prepuce, the appearance of urethral groove, the anomalous urinary stream during fetal micturition                 | Posterior hypospadias, ventricular septal defect | 46XY           |
| 4    | 31     | A blunt tip at the penile shaft, a short penile shaft, the ventral incurvation of the penis, thickened dorsal prepuce, penoscrotal transposition                                          | Posterior hypospadias, left undescended testis   | 46XY           |
| 5    | 31     | A blunt tip at the penile shaft, a short penile shaft, penoscrotal transposition, the appearance of urethral groove, the anomalous urinary stream during fetal micturition                | Anterior hypospadias                             | 46XY           |
| 6    | 34     | A blunt tip at the penile shaft, a short penile shaft, the ventral incurvation of the penis, thickened dorsal prepuce,                                                                    | Posterior hypospadias                            | 46XY           |

|    |    |                                                                                                                                                                                                                                            |                                                                                                       |       |
|----|----|--------------------------------------------------------------------------------------------------------------------------------------------------------------------------------------------------------------------------------------------|-------------------------------------------------------------------------------------------------------|-------|
|    |    | penoscrotal transposition, the appearance of urethral groove                                                                                                                                                                               |                                                                                                       |       |
| 7  | 34 | A blunt tip at the penile shaft, a short penile shaft, the ventral incurvation of the penis, the appearance of urethral groove, the anomalous urinary stream during fetal micturition                                                      | Anterior hypospadias, right undescended testis, left renal deficiency                                 | NA    |
| 8  | 32 | A blunt tip at the penile shaft, a short penile shaft, the ventral incurvation of the penis, thickened dorsal prepuce, penoscrotal transposition, the appearance of urethral groove, the anomalous urinary stream during fetal micturition | Posterior hypospadias                                                                                 | 46XY  |
| 9  | 29 | A blunt tip at the penile shaft, a short penile shaft, the ventral incurvation of the penis, penoscrotal transposition, the appearance of urethral groove                                                                                  | Posterior hypospadias, bilateral undescended testis, right inguinal hernia, ventricular septal defect | 46XY  |
| 10 | 26 | A blunt tip at the penile shaft, the ventral incurvation of the penis, thickened dorsal prepuce, penoscrotal transposition, the appearance of urethral groove                                                                              | Anterior hypospadias, bilateral undescended testis,                                                   | NA    |
| 11 | 27 | A blunt tip at the penile shaft, a short penile shaft, the ventral incurvation of the penis, thickened dorsal prepuce, penoscrotal transposition                                                                                           | Posterior hypospadias, bilateral undescended testis                                                   | 46XY  |
| 12 | 26 | A blunt tip at the penile shaft, a short penile shaft, the ventral incurvation of the penis, penoscrotal transposition, the appearance of urethral groove, the anomalous urinary stream during fetal micturition                           | Posterior hypospadias, bilateral undescended testis                                                   | 46XY  |
| 13 | 33 | A blunt tip at the penile shaft, thickened dorsal prepuce, penoscrotal transposition                                                                                                                                                       | Middle hypospadias                                                                                    | 47XXY |
| 14 | 28 | A blunt tip at the penile shaft, a short penile shaft, thickened dorsal prepuce                                                                                                                                                            | Middle hypospadias, bilateral undescended testis                                                      | 46XY  |
| 15 | 27 | A blunt tip at the penile shaf, the ventral incurvation of the penis, thickened dorsal prepuce, penoscrotal transposition, the appearance of urethral groove                                                                               | Middle hypospadias, left inguinal hernia,                                                             | 46XY  |
| 16 | 22 | A blunt tip at the penile shaft, a short                                                                                                                                                                                                   | Middle hypospadias,bilateral                                                                          | 47XXY |

|    |    |                                                                                                                                                                                                                                            |                                                              |      |
|----|----|--------------------------------------------------------------------------------------------------------------------------------------------------------------------------------------------------------------------------------------------|--------------------------------------------------------------|------|
|    |    | penile shaft, the ventral incurvation of the penis, thickened dorsal prepuce, penoscrotal transposition                                                                                                                                    | undescended testis, left strephenopodia, left hydronephrosis |      |
| 17 | 26 | A blunt tip at the penile shaft, a short penile shaft, the ventral incurvation of the penis, thickened dorsal prepuce, penoscrotal transposition                                                                                           | Posterior hypospadias, bilateral undescended testis          | 46XY |
| 18 | 21 | A blunt tip at the penile shaft, a short penile shaft, the ventral incurvation of the penis, thickened dorsal prepuce, penoscrotal transposition, the appearance of urethral groove, the anomalous urinary stream during fetal micturition | Posterior hypospadias                                        | 46XY |
| 19 | 33 | A blunt tip at the penile shaft, a short penile shaft, the ventral incurvation of the penis, thickened dorsal prepuce, penoscrotal transposition, the anomalous urinary stream during fetal micturition                                    | Middle hypospadias, right inguinal hernia,                   | NA   |
| 20 | 29 | A blunt tip at the penile shaft, a short penile shaft                                                                                                                                                                                      | Anterior hypospadias, bilateral undescended testis,          | 46XY |
| 21 | 22 | A blunt tip at the penile shaft, a short penile shaft, thickened dorsal prepuce,tra                                                                                                                                                        | Posterior hypospadias                                        | 46XY |

GA indicates gestational age at diagnosis; and NA, not available.

**Table 3. Postpartum follow-up findings**

| ID | after birth or induced labor | 2D | 2D+3D |
|----|------------------------------|----|-------|
| 1  | 1                            | 1  | 1     |
| 2  | 1                            | 1  | 1     |
| 3  | 1                            | 1  | 1     |
| 4  | 1                            | 1  | 1     |
| 5  | 1                            | 1  | 1     |
| 6  | 1                            | 1  | 1     |
| 7  | 1                            | 1  | 1     |
| 8  | 1                            | 1  | 1     |
| 9  | 1                            | 1  | 1     |
| 10 | 1                            | 1  | 1     |

|    |   |   |   |
|----|---|---|---|
| 11 | 1 | 1 | 1 |
| 12 | 1 | 1 | 1 |
| 13 | 1 | 1 | 1 |
| 14 | 1 | 1 | 1 |
| 15 | 1 | 1 | 1 |
| 16 | 1 | 1 | 1 |
| 17 | 1 | 1 | 1 |
| 18 | 1 | 1 | 1 |
| 19 | 1 | 1 | 0 |
| 20 | 1 | 1 | 1 |
| 21 | 1 | 1 | 1 |
| 22 | 1 | 1 | 1 |
| 23 | 1 | 0 | 1 |
| 24 | 1 | 0 | 1 |
| 25 | 1 | 0 | 0 |
| 26 | 1 | 0 | 0 |
| 27 | 1 | 0 | 0 |
| 28 | 1 | 0 | 1 |
| 29 | 0 | 0 | 0 |
| 30 | 0 | 0 | 0 |
| 31 | 0 | 0 | 0 |
| 32 | 0 | 0 | 0 |
| 33 | 0 | 0 | 0 |
| 34 | 0 | 0 | 0 |
| 35 | 0 | 0 | 0 |
| 36 | 0 | 0 | 0 |
| 37 | 0 | 0 | 0 |
| 38 | 0 | 0 | 0 |
| 39 | 0 | 0 | 0 |
| 40 | 0 | 0 | 0 |
| 41 | 0 | 0 | 0 |
| 42 | 0 | 0 | 0 |
| 43 | 0 | 1 | 0 |
| 44 | 0 | 1 | 0 |
| 45 | 0 | 1 | 1 |
| 46 | 0 | 1 | 1 |
| 47 | 0 | 1 | 1 |

1 indicates hypospadias, and 0 no hypospadias

Table 4 The AUC of 2DUS combined with 3DUS.

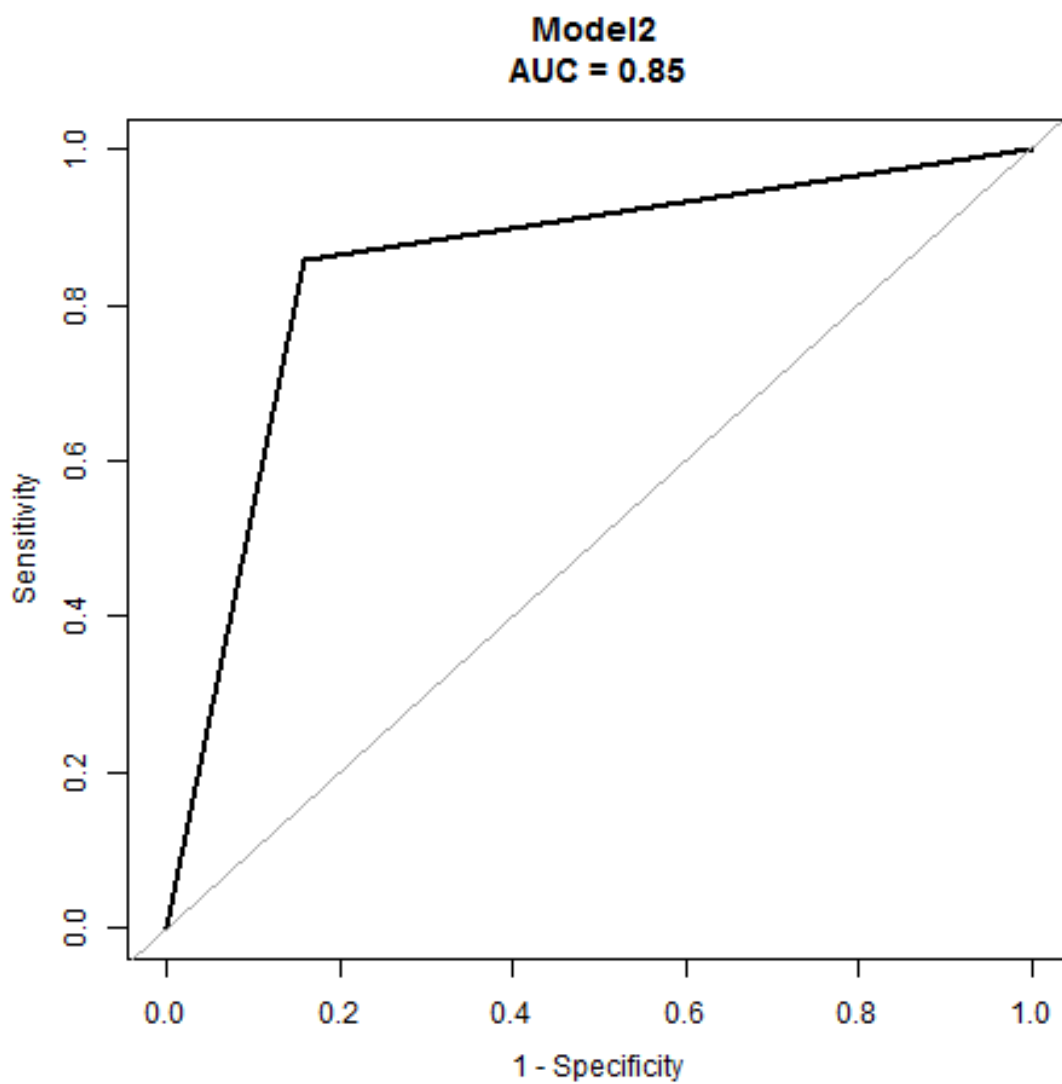

Model 2 indicates 2DUS combined with 3DUS

**Table 5. The AUC of 2DUS alone**

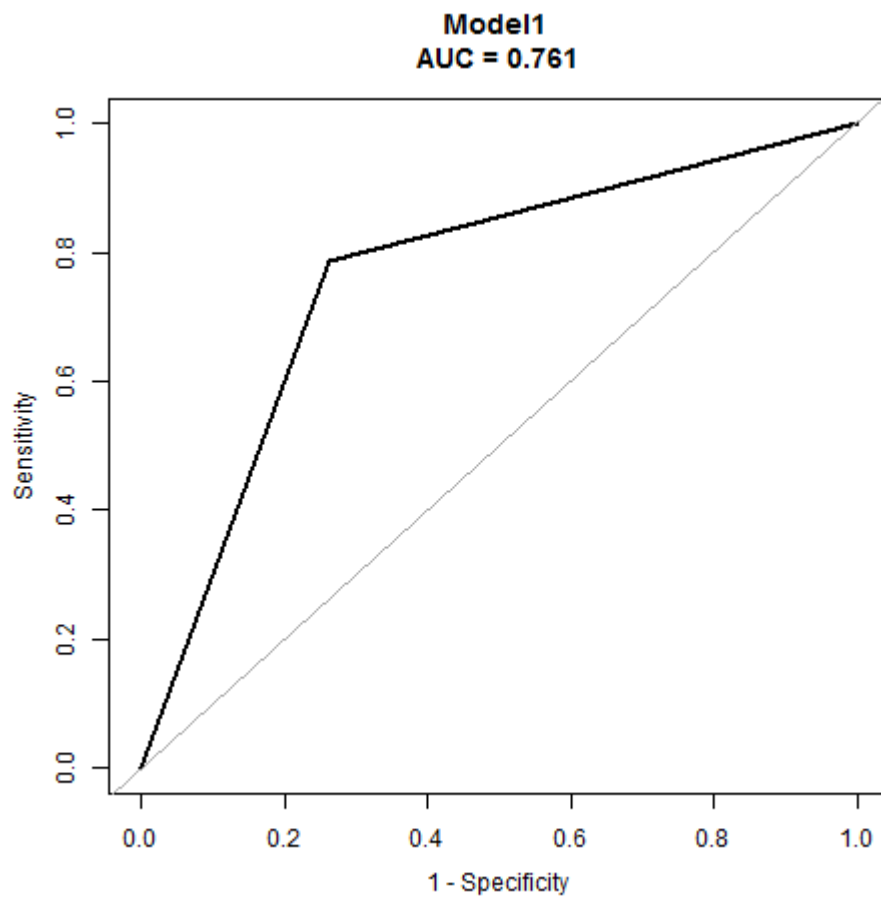

Model 1 indicates 2DUS alone

Table 6. Power on the data (Tests for Two Correlated Proportions (McNemar Test)).

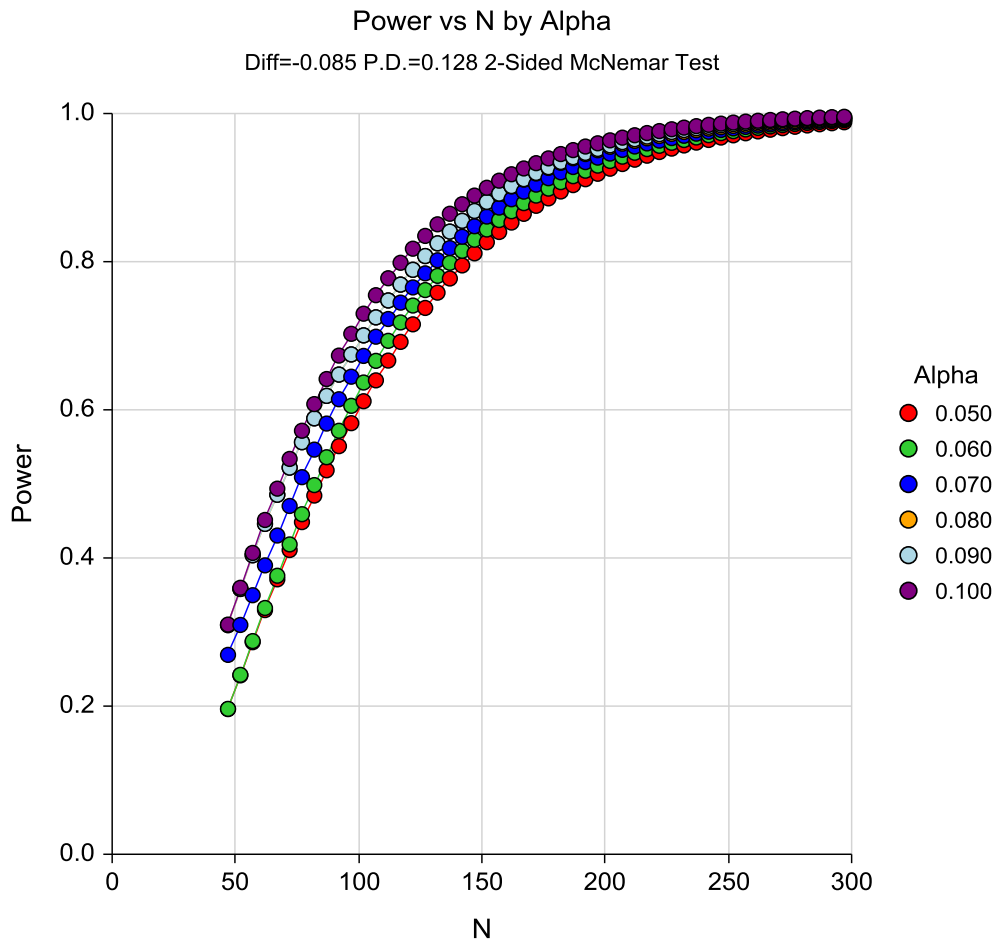

Supplement: 41598_2019_45221_MOESM1_ESM.pdf [file 41598_2019_45221_MOESM1_ESM.pdf]
